# Supplementary material for: A tale of two conformers: spectroscopic evidence for halide catalysed formic acid isomerisation
Source: Royal Society of Chemistry journal article supplement (doi:10.1039/d2cp03634g), 2022-01-01
Supplement: d2cp03634g1.pdf [file d2cp03634g1.pdf]

SUPPLEMENTARY MATERIAL

The supporting information presented here comprises results of *ab initio* calculations performed on the halide-formic acid complexes. Included are energetics, vibrational data, and structural information in the form of cartesian coordinates predicted using the CCSD(T) method, with aug-cc-pVDZ, TZ, and QZ basis sets, referred to collectively as AVXZ. In addition to computational data, a putative assignment of the presented mass spectrum is also provided.

# 1 Energetics

**Table S1:** Energies of the bare formic acid conformers, the halide anions, and the halogen radicals determined from CCSD(T) calculations.

|                          |      | $E_{CCSD(T)}$<br>[ $E_h$ ] | zpe<br>[kJ mol <sup>-1</sup> ] | VDE<br>[eV] | Experimental SO*<br>[eV] | Split<br>[eV] | Literature $^2P_{3/2}$ VDE <sup>†</sup><br>[eV] | Shift<br>[eV] |
|--------------------------|------|----------------------------|--------------------------------|-------------|--------------------------|---------------|-------------------------------------------------|---------------|
| <i>Anti</i> -formic acid | AVDZ | -189.349020                |                                |             |                          |               |                                                 |               |
|                          | AVTZ | -189.511048                | 87.7                           |             |                          |               |                                                 |               |
|                          | AVQZ | -189.560920                |                                |             |                          |               |                                                 |               |
|                          | CBS  | -189.589247                |                                |             |                          |               |                                                 |               |
| <i>Syn</i> -formic acid  | AVDZ | -189.355744                |                                |             |                          |               |                                                 |               |
|                          | AVTZ | -189.517767                | 88.7                           |             |                          |               |                                                 |               |
|                          | AVQZ | -189.567652                |                                |             |                          |               |                                                 |               |
|                          | CBS  | -189.596005                |                                |             |                          |               |                                                 |               |
| Cl <sup>-</sup>   Cl     | AVDZ | -459.743800   -459.618075  |                                | 3.421       |                          | 3.385   3.494 |                                                 | +0.228        |
|                          | AVTZ | -459.806627   -459.677858  |                                | 3.504       |                          | 3.468   3.578 |                                                 | +0.145        |
|                          | AVQZ | -459.828395   -459.695891  |                                | 3.606       |                          | 3.570   3.679 |                                                 | +0.043        |
|                          | CBS  | -459.841427   -459.706279  |                                | 3.677       | -0.036   +0.073          | 3.641   3.750 | 3.613                                           | -0.028        |
| Br <sup>-</sup>   Br     | AVDZ | -415.726436   -415.606190  |                                | 3.272       |                          | 3.120   3.577 |                                                 | +0.244        |
|                          | AVTZ | -415.836425   -415.713279  |                                | 3.351       |                          | 3.199   3.656 |                                                 | +0.165        |
|                          | AVQZ | -415.912356   -415.785328  |                                | 3.457       |                          | 3.305   3.762 |                                                 | +0.059        |
|                          | CBS  | -415.959933   -415.830231  |                                | 3.529       | -0.152   +0.305          | 3.377   3.834 | 3.364                                           | -0.013        |
| I <sup>-</sup>   I       | AVDZ | -294.883258   -294.769062  |                                | 3.107       |                          | 2.793   3.735 |                                                 | +0.266        |
|                          | AVTZ | -294.982288   -294.865413  |                                | 3.180       |                          | 2.866   3.808 |                                                 | +0.193        |
|                          | AVQZ | -295.061242   -294.939975  |                                | 3.300       |                          | 2.986   3.928 |                                                 | +0.073        |
|                          | CBS  | -295.110115   -294.985954  |                                | 3.379       | -0.314   +0.628          | 3.065   4.007 | 3.059                                           | -0.005        |

\* Values from <http://www.nist.gov/pml/data/handbook/index.cfm>

† Values from <http://webbook.nist.gov>

‡ Shift refers to the difference between the predicted and literature Electron Detachment Energy

**Table S2:** Energetic parameters predicted for the chloride complexes with *anti*- and *syn*-formic acid, determined from CCSD(T) calculations.

|                                                                       |      | $E_{CCSD(T)}$<br>[ $E_h$ ] | $D_e$<br>[kJ mol <sup>-1</sup> ] | $D_0$<br>[kJ mol <sup>-1</sup> ] | VDE<br>[eV] |
|-----------------------------------------------------------------------|------|----------------------------|----------------------------------|----------------------------------|-------------|
| $Cl^- \cdots HCOOH$<br><i>Anti</i> -formic acid conformer<br>OH bound | AVDZ | -649.141967                |                                  |                                  |             |
|                                                                       | AVTZ | -649.368568                |                                  |                                  |             |
|                                                                       | AVQZ | -649.439696                |                                  |                                  |             |
|                                                                       | CBS  | -649.480836                | 131.7                            | 129.6                            | 5.12   5.23 |
| $Cl^- \cdots HCOOH$<br><i>Syn</i> -formic acid conformer<br>OH bound  | AVDZ | -649.133180                |                                  |                                  |             |
|                                                                       | AVTZ | -649.359661                |                                  |                                  |             |
|                                                                       | AVQZ | -649.430753                |                                  |                                  |             |
|                                                                       | CBS  | -649.471881                | 90.4                             | 91.3                             | 4.75   4.86 |
| $Cl^- \cdots HCOOH$<br><i>Syn</i> -formic acid conformer<br>CH bound  | AVDZ | -649.118289                |                                  |                                  |             |
|                                                                       | AVTZ | -649.343127                |                                  |                                  |             |
|                                                                       | AVQZ | -649.414337                |                                  |                                  |             |
|                                                                       | CBS  | -649.455499                | 47.4                             | 46.0                             | 4.19   4.30 |

**Table S3:** Energetic parameters predicted for the bromide complexes with *anti*- and *syn*-formic acid, determined from CCSD(T) calculations.

|                                                                       |      | $E_{CCSD(T)}$<br>[ $E_h$ ] | $D_e$<br>[kJ mol <sup>-1</sup> ] | $D_0$<br>[kJ mol <sup>-1</sup> ] | VDE<br>[eV] |
|-----------------------------------------------------------------------|------|----------------------------|----------------------------------|----------------------------------|-------------|
| $Br^- \cdots HCOOH$<br><i>Anti</i> -formic acid conformer<br>OH bound | AVDZ | -605.119999                |                                  |                                  |             |
|                                                                       | AVTZ | -605.394379                |                                  |                                  |             |
|                                                                       | AVQZ | -605.520357                |                                  |                                  |             |
|                                                                       | CBS  | -605.596485                | 124.2                            | 121.9                            | 4.63   5.08 |
| $Br^- \cdots HCOOH$<br><i>Syn</i> -formic acid conformer<br>OH bound  | AVDZ | -605.111381                |                                  |                                  |             |
|                                                                       | AVTZ | -605.385591                |                                  |                                  |             |
|                                                                       | AVQZ | -605.511444                |                                  |                                  |             |
|                                                                       | CBS  | -605.587497                | 82.9                             | 83.1                             | 4.24   4.70 |
| $Br^- \cdots HCOOH$<br><i>Syn</i> -formic acid conformer<br>CH bound  | AVDZ | -605.099407                |                                  |                                  |             |
|                                                                       | AVTZ | -605.371713                |                                  |                                  |             |
|                                                                       | AVQZ | -605.497055                |                                  |                                  |             |
|                                                                       | CBS  | -605.572725                | 44.1                             | 42.5                             | 3.84   4.29 |

**Table S4:** Energetic parameters predicted for the iodide complexes with *anti*- and *syn*-formic acid, determined from CCSD(T) calculations.

|                                                |                          | $E_{CCSD(T)}$<br>[ $E_h$ ] | $D_e$<br>[kJ mol <sup>-1</sup> ] | $D_0$<br>[kJ mol <sup>-1</sup> ] | VDE<br>[eV] |
|------------------------------------------------|--------------------------|----------------------------|----------------------------------|----------------------------------|-------------|
| <i>Anti</i> -formic acid conformer<br>OH bound | I <sup>-</sup> ... HCOOH | AVDZ                       | -484.271161                      |                                  |             |
|                                                |                          | AVTZ                       | -484.534177                      |                                  |             |
|                                                |                          | AVQZ                       | -484.662756                      |                                  |             |
|                                                |                          | CBS                        | -484.739850                      | 106.3                            | 103.9       |
| <i>Syn</i> -formic acid conformer<br>OH bound  | I <sup>-</sup> ... HCOOH | AVDZ                       | -484.262638                      |                                  |             |
|                                                |                          | AVTZ                       | -484.525874                      |                                  |             |
|                                                |                          | AVQZ                       | -484.654301                      |                                  |             |
|                                                |                          | CBS                        | -484.731292                      | 66.1                             | 65.8        |
| <i>Syn</i> -formic acid conformer<br>CH bound  | I <sup>-</sup> ... HCOOH | AVDZ                       | -484.253749                      |                                  |             |
|                                                |                          | AVTZ                       | -484.514794                      |                                  |             |
|                                                |                          | AVQZ                       | -484.643135                      |                                  |             |
|                                                |                          | CBS                        | -484.720052                      | 36.6                             | 35.1        |

**Table S5:** Energetic parameters predicted for the transition states connecting the *anti*- and *syn*-formic acid conformers, both in halide complexes and for the bare formic acid molecule, determined from CCSD(T) calculations.

|                           |      | $E_{CCSD(T)}$<br>[ $E_h$ ] | $\Delta G^{298K}$<br>(from <i>syn</i> -formic acid)<br>[kJ mol <sup>-1</sup> ] | $\Delta G^{298K}$<br>(from <i>anti</i> -formic acid)<br>[kJ mol <sup>-1</sup> ] |
|---------------------------|------|----------------------------|--------------------------------------------------------------------------------|---------------------------------------------------------------------------------|
| Cl <sup>-</sup> ... HCOOH | AVDZ | -649.121580                |                                                                                |                                                                                 |
|                           | AVTZ | -649.348235                |                                                                                |                                                                                 |
|                           | AVQZ | -649.419201                |                                                                                |                                                                                 |
|                           | CBS  | -649.460252                | 26.4                                                                           | 47.5                                                                            |
| Br <sup>-</sup> ... HCOOH | AVDZ | -605.099226                |                                                                                |                                                                                 |
|                           | AVTZ | -605.373671                |                                                                                |                                                                                 |
|                           | AVQZ | -605.499512                |                                                                                |                                                                                 |
|                           | CBS  | -605.575563                | 27.5                                                                           | 48.9                                                                            |
| I <sup>-</sup> ... HCOOH  | AVDZ | -484.250510                |                                                                                |                                                                                 |
|                           | AVTZ | -484.513448                |                                                                                |                                                                                 |
|                           | AVQZ | -484.641867                |                                                                                |                                                                                 |
|                           | CBS  | -484.718866                | 28.6                                                                           | 49.2                                                                            |
| HCOOH                     | AVDZ | -189.335822                |                                                                                |                                                                                 |
|                           | AVTZ | -189.497855                |                                                                                |                                                                                 |
|                           | AVQZ | -189.547574                |                                                                                |                                                                                 |
|                           | CBS  | -189.575821                | 47.8                                                                           | 31.0                                                                            |

## 2 Vibrational Data

**Table S6:** Vibrational frequencies, in  $\text{cm}^{-1}$ , of the bare formic acid conformers.

|            | Symmetry | <i>anti</i> -formic acid  | Symmetry | <i>syn</i> -formic acid   |
|------------|----------|---------------------------|----------|---------------------------|
| $\omega_1$ | $a'$     | 655                       | $a'$     | 627                       |
| $\omega_2$ | $a'$     | 1114                      | $a'$     | 1132                      |
| $\omega_3$ | $a'$     | 1288                      | $a'$     | 1311                      |
| $\omega_4$ | $a'$     | 1415                      | $a'$     | 1405                      |
| $\omega_5$ | $a'$     | 1843                      | $a'$     | 1803                      |
| $\omega_6$ | $a'$     | 3006                      | $a'$     | 3088                      |
| $\omega_7$ | $a'$     | 3805                      | $a'$     | 3742                      |
| $\omega_8$ | $a''$    | 513                       | $a''$    | 665                       |
| $\omega_9$ | $a''$    | 1029                      | $a''$    | 1051                      |
| zpe        |          | 87.7 $\text{kJ mol}^{-1}$ |          | 88.7 $\text{kJ mol}^{-1}$ |

**Table S7:** Vibrational frequencies, in  $\text{cm}^{-1}$ , of halide complexes with *anti*-formic acid where the halide anion binds to the acidic hydrogen (OH) portion of the formic acid molecule.

|               | Symmetry | $\text{Cl}^- \cdots \text{HCOOH}$ | Symmetry | $\text{Br}^- \cdots \text{HCOOH}$ | Symmetry | $\text{I}^- \cdots \text{HCOOH}$ |
|---------------|----------|-----------------------------------|----------|-----------------------------------|----------|----------------------------------|
| $\omega_1$    | $a'$     | 110                               | $a'$     | 92                                | $a'$     | 83                               |
| $\omega_2$    | $a'$     | 250                               | $a'$     | 205                               | $a'$     | 175                              |
| $\omega_3$    | $a'$     | 698                               | $a'$     | 694                               | $a'$     | 689                              |
| $\omega_4$    | $a'$     | 1230                              | $a'$     | 1217                              | $a'$     | 1202                             |
| $\omega_5$    | $a'$     | 1404                              | $a'$     | 1404                              | $a'$     | 1407                             |
| $\omega_6$    | $a'$     | 1466                              | $a'$     | 1443                              | $a'$     | 1414                             |
| $\omega_7$    | $a'$     | 1769                              | $a'$     | 1776                              | $a'$     | 1783                             |
| $\omega_8$    | $a'$     | 2850                              | $a'$     | 3009                              | $a'$     | 3022                             |
| $\omega_9$    | $a'$     | 3014                              | $a'$     | 3039                              | $a'$     | 3193                             |
| $\omega_{10}$ | $a''$    | 166                               | $a''$    | 165                               | $a''$    | 159                              |
| $\omega_{11}$ | $a''$    | 985                               | $a''$    | 935                               | $a''$    | 867                              |
| $\omega_{12}$ | $a''$    | 1074                              | $a''$    | 1074                              | $a''$    | 1070                             |
| zpe           |          | 89.8 $\text{kJ mol}^{-1}$         |          | 90.0 $\text{kJ mol}^{-1}$         |          | 90.1 $\text{kJ mol}^{-1}$        |

**Table S8:** Vibrational frequencies, in  $\text{cm}^{-1}$ , of halide complexes with *syn*-formic acid where the halide anion binds to the acidic hydrogen (OH) portion of the formic acid molecule.

|               | Symmetry | $\text{Cl}^- \cdots \text{HCOOH}$ | Symmetry | $\text{Br}^- \cdots \text{HCOOH}$ | Symmetry | $\text{I}^- \cdots \text{HCOOH}$ |
|---------------|----------|-----------------------------------|----------|-----------------------------------|----------|----------------------------------|
| $\omega_1$    | $a'$     | 105                               | $a'$     | 87                                | $a'$     | 75                               |
| $\omega_2$    | $a'$     | 254                               | $a'$     | 206                               | $a'$     | 174                              |
| $\omega_3$    | $a'$     | 688                               | $a'$     | 677                               | $a'$     | 666                              |
| $\omega_4$    | $a'$     | 1244                              | $a'$     | 1225                              | $a'$     | 1205                             |
| $\omega_5$    | $a'$     | 1371                              | $a'$     | 1359                              | $a'$     | 1347                             |
| $\omega_6$    | $a'$     | 1416                              | $a'$     | 1417                              | $a'$     | 1418                             |
| $\omega_7$    | $a'$     | 1751                              | $a'$     | 1762                              | $a'$     | 1771                             |
| $\omega_8$    | $a'$     | 2638                              | $a'$     | 2868                              | $a'$     | 2979                             |
| $\omega_9$    | $a'$     | 2955                              | $a'$     | 2975                              | $a'$     | 3097                             |
| $\omega_{10}$ | $a''$    | 175                               | $a''$    | 171                               | $a''$    | 162                              |
| $\omega_{11}$ | $a''$    | 1000                              | $a''$    | 961                               | $a''$    | 904                              |
| $\omega_{12}$ | $a''$    | 1090                              | $a''$    | 1077                              | $a''$    | 1069                             |
| zpe           |          | 87.8 $\text{kJ mol}^{-1}$         |          | 88.4 $\text{kJ mol}^{-1}$         |          | 88.9 $\text{kJ mol}^{-1}$        |

**Table S9:** Vibrational frequencies, in  $\text{cm}^{-1}$ , of halide complexes with *syn*-formic acid where the halide anion binds to the formyl hydrogen (CH) portion of the formic acid molecule.

|               | Symmetry | $\text{Cl}^- \cdots \text{HCOOH}$ | Symmetry | $\text{Br}^- \cdots \text{HCOOH}$ | Symmetry | $\text{I}^- \cdots \text{HCOOH}$ |
|---------------|----------|-----------------------------------|----------|-----------------------------------|----------|----------------------------------|
| $\omega_1$    | $a'$     | 88                                | $a'$     | 78                                | $a'$     | 71                               |
| $\omega_2$    | $a'$     | 136                               | $a'$     | 110                               | $a'$     | 89                               |
| $\omega_3$    | $a'$     | 625                               | $a'$     | 626                               | $a'$     | 626                              |
| $\omega_4$    | $a'$     | 1088                              | $a'$     | 1094                              | $a'$     | 1101                             |
| $\omega_5$    | $a'$     | 1288                              | $a'$     | 1291                              | $a'$     | 1294                             |
| $\omega_6$    | $a'$     | 1438                              | $a'$     | 1434                              | $a'$     | 1427                             |
| $\omega_7$    | $a'$     | 1744                              | $a'$     | 1751                              | $a'$     | 1758                             |
| $\omega_8$    | $a'$     | 2936                              | $a'$     | 2974                              | $a'$     | 3013                             |
| $\omega_9$    | $a'$     | 3734                              | $a'$     | 3737                              | $a'$     | 3739                             |
| $\omega_{10}$ | $a''$    | 177                               | $a''$    | 176                               | $a''$    | 155                              |
| $\omega_{11}$ | $a''$    | 669                               | $a''$    | 670                               | $a''$    | 669                              |
| $\omega_{12}$ | $a''$    | 1146                              | $a''$    | 1141                              | $a''$    | 1127                             |
| zpe           |          | 90.1 $\text{kJ mol}^{-1}$         |          | 90.2 $\text{kJ mol}^{-1}$         |          | 90.1 $\text{kJ mol}^{-1}$        |

**Table S10:** Vibrational frequencies, in  $\text{cm}^{-1}$ , of the bare formic acid transition state separating the two conformers.

|            | Symmetry | formic acid               |
|------------|----------|---------------------------|
| $\omega_1$ | $a$      | 599i                      |
| $\omega_2$ | $a$      | 670                       |
| $\omega_3$ | $a$      | 915                       |
| $\omega_4$ | $a$      | 1090                      |
| $\omega_5$ | $a$      | 1208                      |
| $\omega_6$ | $a$      | 1392                      |
| $\omega_7$ | $a$      | 1806                      |
| $\omega_8$ | $a$      | 3039                      |
| $\omega_9$ | $a$      | 3827                      |
| zpe        |          | 83.4 $\text{kJ mol}^{-1}$ |

**Table S11:** Vibrational frequencies, in  $\text{cm}^{-1}$ , of transition states of halide complexes with formic acid separating the two conformers of formic acid.

|               | Symmetry | $\text{Cl}^- \cdots \text{HCOOH}$ | Symmetry | $\text{Br}^- \cdots \text{HCOOH}$ | Symmetry | $\text{I}^- \cdots \text{HCOOH}$ |
|---------------|----------|-----------------------------------|----------|-----------------------------------|----------|----------------------------------|
| $\omega_1$    | $a$      | 289i                              | $a$      | 309i                              | $a$      | 342i                             |
| $\omega_2$    | $a$      | 98                                | $a$      | 81                                | $a$      | 68                               |
| $\omega_3$    | $a$      | 267                               | $a$      | 221                               | $a$      | 188                              |
| $\omega_4$    | $a$      | 655                               | $a$      | 564                               | $a$      | 446                              |
| $\omega_5$    | $a$      | 712                               | $a$      | 698                               | $a$      | 691                              |
| $\omega_6$    | $a$      | 1017                              | $a$      | 1005                              | $a$      | 989                              |
| $\omega_7$    | $a$      | 1213                              | $a$      | 1192                              | $a$      | 1171                             |
| $\omega_8$    | $a$      | 1317                              | $a$      | 1304                              | $a$      | 1286                             |
| $\omega_9$    | $a$      | 1406                              | $a$      | 1406                              | $a$      | 1404                             |
| $\omega_{10}$ | $a$      | 1732                              | $a$      | 1748                              | $a$      | 1759                             |
| $\omega_{11}$ | $a$      | 2427                              | $a$      | 2751                              | $a$      | 2967                             |
| $\omega_{12}$ | $a$      | 2939                              | $a$      | 2960                              | $a$      | 3027                             |
| zpe           |          | 82.4 $\text{kJ mol}^{-1}$         |          | 83.3 $\text{kJ mol}^{-1}$         |          | 83.7 $\text{kJ mol}^{-1}$        |

### 3 Cartesian Coordinates

**Table S12:** Cartesian coordinates, in Å, of both conformers of bare formic acid.

| Atom | <i>anti</i> -formic acid |           |          | <i>syn</i> -formic acid |           |          |
|------|--------------------------|-----------|----------|-------------------------|-----------|----------|
|      | X                        | Y         | Z        | X                       | Y         | Z        |
| C    | -0.101716                | 0.401839  | 0.000000 | 0.099296                | 0.414537  | 0.000000 |
| O    | 1.1100912                | -0.222732 | 0.000000 | -1.137290               | -0.122072 | 0.000000 |
| H    | 1.800226                 | 0.442239  | 0.000000 | -1.021372               | -1.085165 | 0.000000 |
| O    | -1.136154                | -0.201141 | 0.000000 | 1.125195                | -0.215514 | 0.000000 |
| H    | -0.029800                | 1.500313  | 0.000000 | 0.031033                | 1.507085  | 0.000000 |

**Table S13:** Cartesian coordinates, in Å, of halide complexes with *anti*-formic acid where the halide anion binds to the acidic hydrogen (OH) portion of the formic acid molecule. (Note: X represents the halide anion).

| Atom | Cl <sup>-</sup> ... HCOOH |           |          | Br <sup>-</sup> ... HCOOH |           |          | I <sup>-</sup> ... HCOOH |           |          |
|------|---------------------------|-----------|----------|---------------------------|-----------|----------|--------------------------|-----------|----------|
|      | X                         | Y         | Z        | X                         | Y         | Z        | X                        | Y         | Z        |
| C    | -1.411711                 | 0.269652  | 0.000000 | -2.203649                 | 0.265400  | 0.000000 | -2.744177                | 0.267335  | 0.000000 |
| O    | -0.721558                 | -0.856085 | 0.000000 | -1.572430                 | -0.899363 | 0.000000 | -2.155263                | -0.924445 | 0.000000 |
| H    | 0.264285                  | -0.604722 | 0.000000 | -0.585134                 | -0.700353 | 0.000000 | -1.169890                | -0.767274 | 0.000000 |
| O    | -2.628661                 | 0.326533  | 0.000000 | -3.414536                 | 0.379820  | 0.000000 | -3.948643                | 0.419573  | 0.000000 |
| H    | -0.772163                 | 1.165622  | 0.000000 | -1.516408                 | 1.124697  | 0.000000 | -2.026189                | 1.100605  | 0.000000 |
| X    | 2.031489                  | 0.133519  | 0.000000 | 1.372658                  | 0.059525  | 0.000000 | 1.054200                 | 0.035707  | 0.000000 |

**Table S14:** Cartesian coordinates, in Å, of halide complexes with *syn*-formic acid where the halide anion binds to the acidic hydrogen (OH) portion of the formic acid molecule. (Note: X represents the halide anion).

| Atom | Cl <sup>-</sup> ... HCOOH |           |          | Br <sup>-</sup> ... HCOOH |           |          | I <sup>-</sup> ... HCOOH |           |          |
|------|---------------------------|-----------|----------|---------------------------|-----------|----------|--------------------------|-----------|----------|
|      | X                         | Y         | Z        | X                         | Y         | Z        | X                        | Y         | Z        |
| C    | -1.832226                 | -0.253232 | 0.000000 | -2.635827                 | -0.226860 | 0.000000 | -3.204844                | -0.208772 | 0.000000 |
| O    | -0.748001                 | -0.996127 | 0.000000 | -1.579488                 | -1.015742 | 0.000000 | -2.160438                | -1.020638 | 0.000000 |
| H    | 0.136367                  | -0.466230 | 0.000000 | -0.693597                 | -0.516611 | 0.000000 | -1.282858                | -0.531814 | 0.000000 |
| O    | -1.927421                 | 0.958858  | 0.000000 | -2.676292                 | 0.986247  | 0.000000 | -3.215007                | 1.002963  | 0.000000 |
| H    | -2.726909                 | -0.901460 | 0.000000 | -3.553140                 | -0.840473 | 0.000000 | -4.131232                | -0.806172 | 0.000000 |
| X    | 1.927175                  | 0.143365  | 0.000000 | 1.317574                  | 0.057804  | 0.000000 | 1.023560                 | 0.032595  | 0.000000 |

**Table S15:** Cartesian coordinates, in Å, of halide complexes with *syn*-formic acid where the halide anion binds to the formyl hydrogen (CH) portion of the formic acid molecule. (Note: X represents the halide anion).

| Atom | Cl <sup>-</sup> ... HCOOH |           |          | Br <sup>-</sup> ... HCOOH |           |          | I <sup>-</sup> ... HCOOH |           |          |
|------|---------------------------|-----------|----------|---------------------------|-----------|----------|--------------------------|-----------|----------|
|      | X                         | Y         | Z        | X                         | Y         | Z        | X                        | Y         | Z        |
| C    | 1.207720                  | 0.119835  | 0.000000 | 2.074034                  | 0.120567  | 0.000000 | 2.675414                 | 0.121890  | 0.000000 |
| O    | 1.701011                  | -1.151029 | 0.000000 | 2.557929                  | -1.151794 | 0.000000 | 3.146191                 | -1.152823 | 0.000000 |
| H    | 2.664057                  | -1.039154 | 0.000000 | 3.521930                  | -1.049104 | 0.000000 | 4.111385                 | -1.062625 | 0.000000 |
| O    | 1.950153                  | 1.080108  | 0.000000 | 2.816239                  | 1.079793  | 0.000000 | 3.417927                 | 1.079332  | 0.000000 |
| H    | 0.101351                  | 0.126153  | 0.000000 | 0.970330                  | 0.131288  | 0.000000 | 1.574672                 | 0.139246  | 0.000000 |
| X    | -2.164204                 | 0.017630  | 0.000000 | -1.461957                 | 0.007981  | 0.000000 | -1.125477                | 0.005070  | 0.000000 |

**Table S16:** Cartesian coordinates, in Å, of the bare formic acid transition state separating the two conformers.

| Atom | HCOOH     |           |           |
|------|-----------|-----------|-----------|
|      | X         | Y         | Z         |
| C    | 0.118900  | 0.408694  | 0.012275  |
| O    | 1.134661  | -0.223493 | 0.002476  |
| H    | 0.087920  | 1.506377  | 0.018142  |
| O    | -1.135230 | -0.159482 | -0.064498 |
| H    | -1.494612 | -0.294538 | 0.820024  |



**Table S17:** Cartesian coordinates, in Å, of transition states of halide complexes with formic acid separating the two conformers of formic acid. (Note: X represents the halide anion).

| Atom | Cl <sup>-</sup> ... HCOOH |           |           | Br <sup>-</sup> ... HCOOH |           |           | I <sup>-</sup> ... HCOOH |           |           |
|------|---------------------------|-----------|-----------|---------------------------|-----------|-----------|--------------------------|-----------|-----------|
|      | X                         | Y         | Z         | X                         | Y         | Z         | X                        | Y         | Z         |
| C    | 1.620189                  | 0.166649  | 0.357719  | 2.407485                  | 0.138059  | 0.366133  | 2.945083                 | 0.109224  | 0.374931  |
| O    | 2.236786                  | -0.736117 | -0.170189 | 2.974970                  | -0.783599 | -0.177574 | 3.486234                 | -0.815053 | -0.185153 |
| H    | 1.847843                  | 0.458286  | 1.399844  | 2.627717                  | 0.391496  | 1.418145  | 3.144508                 | 0.326865  | 1.437485  |
| O    | 0.697759                  | 0.934188  | -0.211936 | 1.543096                  | 0.980606  | -0.205779 | 2.127324                 | 1.006863  | -0.199077 |
| H    | -0.253008                 | 0.511041  | -0.183684 | 0.591157                  | 0.609978  | -0.205222 | 1.178935                 | 0.671874  | -0.228196 |
| X    | -1.944227                 | -0.175723 | 0.016980  | -1.322886                 | -0.073711 | 0.006534  | -1.020347                | -0.042435 | 0.003371  |

## 4 Mass Spectral Assignment

**Table S18:** Putative assignment of mass spectral data presented in main article, associated with a mass spectrum collected from a gas mixture of argon, dibromomethane, and formic acid as well as trace iodomethane.

| Spectral Peak<br>[m/z] | Assignment                                                                  |
|------------------------|-----------------------------------------------------------------------------|
| 78.9                   | $^{79}\text{Br}^-$                                                          |
| 81.1                   | $^{81}\text{Br}^-$                                                          |
| 91.0                   | $\text{HCOO}^- \cdots \text{HCOOH}$                                         |
| 92.0                   | $\text{HCOOH}_2^-$                                                          |
| 97.0                   | $^{79}\text{Br}^- \cdots \text{H}_2\text{O}$                                |
| 99.0                   | $^{81}\text{Br}^- \cdots \text{H}_2\text{O}$                                |
| 107.0                  | $^{79}\text{Br}^- \cdots \text{N}_2$                                        |
| 109.0                  | $^{81}\text{Br}^- \cdots \text{N}_2$                                        |
| 119.0                  | $^{79}\text{Br}^- \cdots \text{Ar}$                                         |
| 121.0                  | $^{81}\text{Br}^- \cdots \text{Ar}$                                         |
| 123.0                  | $^{79}\text{Br}^- \cdots \text{CO}_2$                                       |
| 125.0                  | $^{79}\text{Br}^- \cdots \text{HCOOH}, ^{81}\text{Br}^- \cdots \text{CO}_2$ |
| 127.0                  | $^{81}\text{Br}^- \cdots \text{HCOOH}, \text{I}^-$                          |
| 138.0                  | $\text{HCOOH}_3^-$                                                          |
| 145.0                  | $\text{I}^- \cdots \text{H}_2\text{O}$                                      |
| 159.0                  | $^{79}\text{Br}^- \cdots \text{Ar}_2$                                       |
| 161.0                  | $^{81}\text{Br}^- \cdots \text{Ar}_2$                                       |
